# Supplementary material
Source: HighWire-hosted journal article supplement (https://jitc.bmj.com/content/8/1/e000655)

Supplemental Fig. 6

A

| Scoring Criteria of Multifunctional TAA Response Developed Post vs Pre Vaccination | 3x pre or if no Pre, >100 /1x10 <sup>6</sup> cells Post |
|------------------------------------------------------------------------------------|---------------------------------------------------------|
| PSA                                                                                | 2/25 (8%)                                               |
| Brachyury                                                                          | 4/25 (16%)                                              |
| MUC1                                                                               | 3/25 (12%)                                              |
| Any TAA                                                                            | 7/25 (28%)                                              |

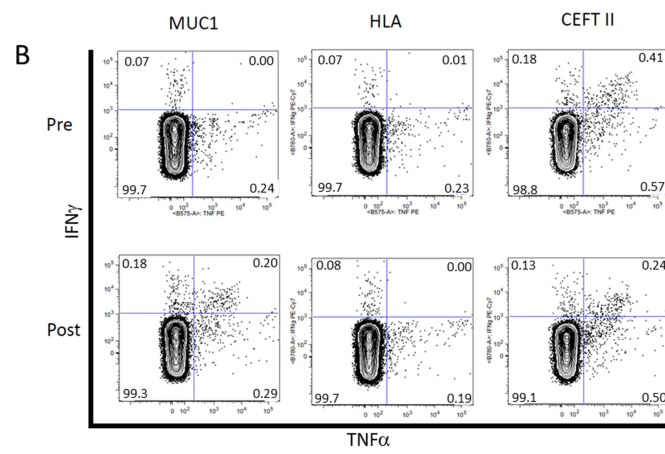

Supplement: inline-supplementary-material-11 [file inline-supplementary-material-11.pdf]
