# Supplementary material
Source: HighWire-hosted journal article supplement (https://jitc.bmj.com/content/8/1/e000655)

Supplemental Fig. 1

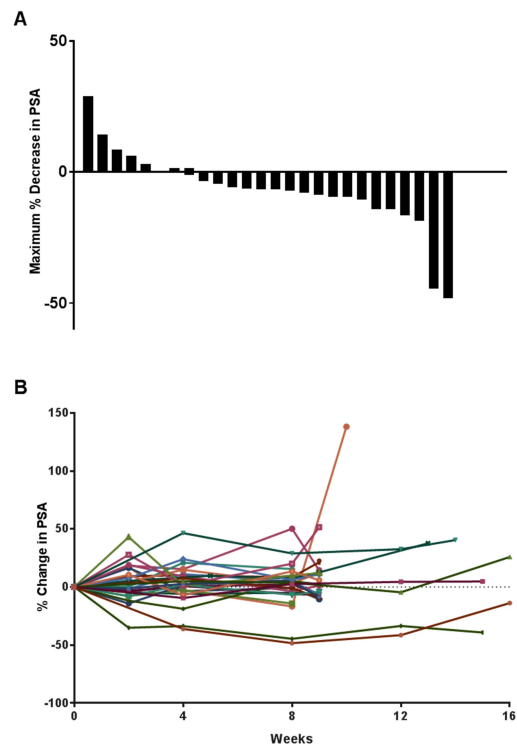

Supplement: inline-supplementary-material-3 [file inline-supplementary-material-3.pdf]

Supplemental Fig. 5

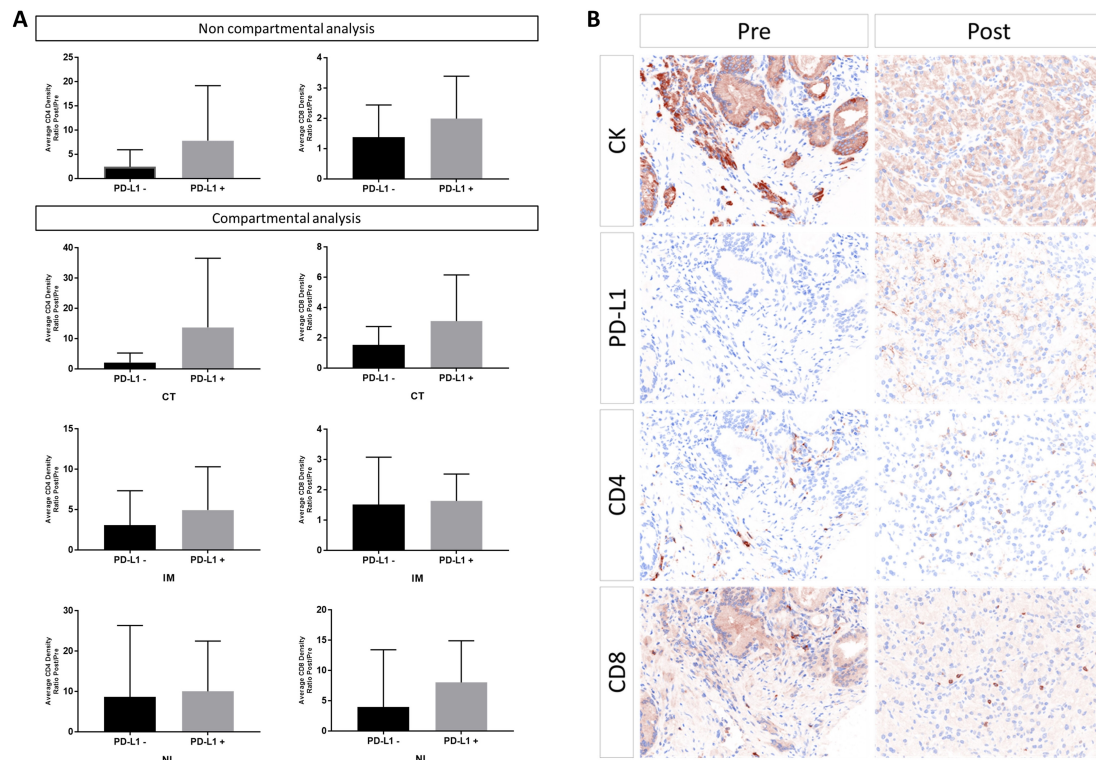

Supplement: inline-supplementary-material-9 [file inline-supplementary-material-9.pdf]
